# Supplementary material for: Control of Ziegler–Natta catalyst activity by the structural design of alkoxysilane-based external donors
Source: Royal Society of Chemistry journal article supplement (doi:10.1039/d0nj00039f), 2020-01-01
Supplement: d0nj00039f1.pdf [file d0nj00039f1.pdf]

## **Supporting Information**

### **Control of Ziegler-Natta Catalyst Activity by Structural Design of Alkoxysilane-based External Donors**

Vikas Khatri,<sup>a</sup> Usharani Sahoo,<sup>b</sup> Sukhdeep Kaur,<sup>b</sup> Rashmi Rani,<sup>b</sup> Gurmeet Singh,<sup>b</sup> Gurpreet Singh Kapur,<sup>b</sup> and Hemant K. Kashyap<sup>a,\*</sup>

<sup>a</sup>*Department of Chemistry, Indian Institute of Technology Delhi, Hauz Khas, New Delhi 110016, India*

<sup>b</sup>*Petrochemical & Polymer Department, R&D Center, IndianOil Corporation Ltd., Sector-13, Faridabad 121007, Haryana, India*

\*Corresponding author, E-mail: [hkashyap@chemistry.iitd.ac.in](mailto:hkashyap@chemistry.iitd.ac.in)

## Contents

### Figures:

| S.No. | Figure No. | Details                                                                                            | Page No. |
|-------|------------|----------------------------------------------------------------------------------------------------|----------|
| 1     | Figure S1  | Optimized geometry of <b>TEAL</b> and external donor complexes.                                    | 3        |
| 2     | Figure S2  | Frontier molecular diagram of <b>TEAL-D2</b> complex.                                              | 3        |
| 3     | Figure S3  | Frontier molecular diagram of <b>TEAL-D3</b> complex.                                              | 4        |
| 4     | Figure S4  | Frontier molecular diagram of <b>TEAL-D5</b> complex.                                              | 4        |
| 5     | Figure S5  | NBO diagram of <b>TEAL-D1</b> complex.                                                             | 5        |
| 6     | Figure S6  | NBO diagram of <b>TEAL-D2</b> complex.                                                             | 5        |
| 7     | Figure S7  | NBO diagram of <b>TEAL-D3</b> complex.                                                             | 6        |
| 8     | Figure S8  | NBO diagram of <b>TEAL-D4</b> complex.                                                             | 6        |
| 9     | Figure S9  | NBO diagram of <b>TEAL-D5</b> complex.                                                             | 7        |
| 10    | Figure S10 | NBO diagram of <b>TEAL-D6</b> complex.                                                             | 7        |
| 11    | Figure S11 | Correlation of average electron densities with the Xylene soluble (Isotacticity) of polypropylene. | 8        |
| 12    | Figure S12 | Correlation of binding energies with the Xylene soluble (Isotacticity) of polypropylene.           | 8        |

### Tables:

| S.No. | Table No. | Details                                                                                                                                    | Page No. |
|-------|-----------|--------------------------------------------------------------------------------------------------------------------------------------------|----------|
| 1     | Table S1  | NPA charges of relevant atoms of <b>TEAL</b> , external donors <b>D1-D6</b> , and complexes of <b>TEAL</b> and external donor.             | 9        |
| 2     | Table S2  | ESP charges (in a.u.) of relevant atoms of <b>TEAL</b> , external donors <b>D1-D6</b> , and complexes of <b>TEAL</b> and external donor.   | 9        |
| 2     | Table S3  | Wiberg bond index (WBI) of relevant atoms of <b>TEAL</b> , external donors <b>D1-D6</b> , and complexes of <b>TEAL</b> and external donor. | 10       |

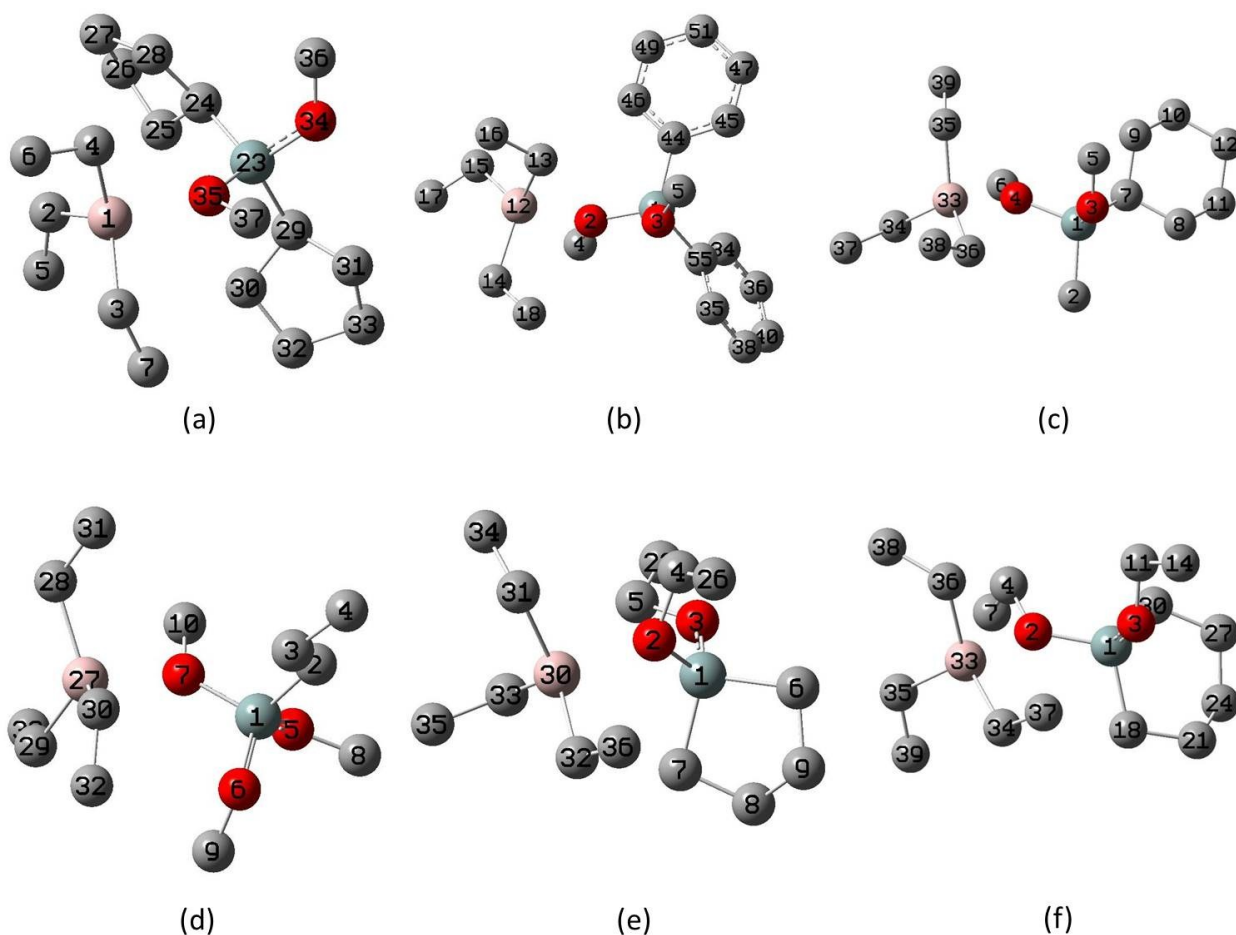

**Figure S1:** Optimized geometries of (a) **TEAL-D1**, (b) **TEAL-D2**, (c) **TEAL-D3**, (d) **TEAL-D4**, (e) **TEAL-D5**, and (f) **TEAL-D6** complexes. Hydrogen atoms are omitted for the sake of clarity.

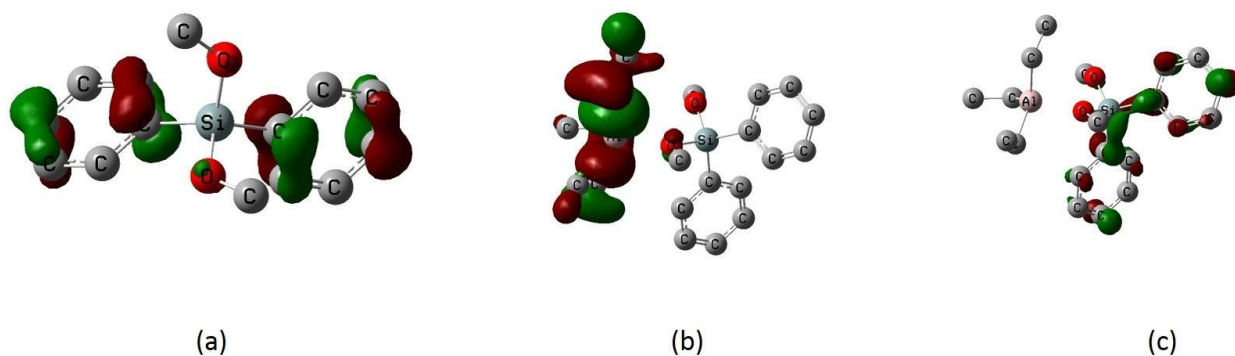

**Figure S2:** Computed frontier highest occupied molecular orbitals of (a) **D2** and (b) **TEAL-D2** complex, and the lowest unoccupied molecular orbital of (c) **TEAL-D2**. In **D2**, the HOMOs are localized over phenyl rings. MOs of **TEAL-D2** complex indicate the donation of electron from the donor to **TEAL**.

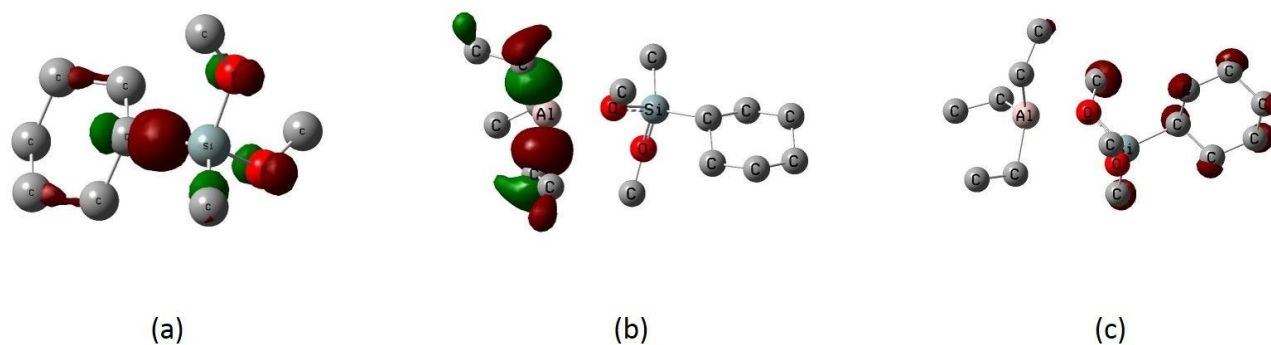

**Figure S3:** Computed frontier highest occupied molecular orbitals of (a) **D3** and (b) **TEAL-D3** complex, and the lowest unoccupied molecular orbital of (c) **TEAL-D3**. In **D3**, the HOMOs are localized on oxygen atoms and the carbon atom directly bonded to Si atom. MOs of **TEAL-D3** complex indicate the donation of electron from the donor to **TEAL**.

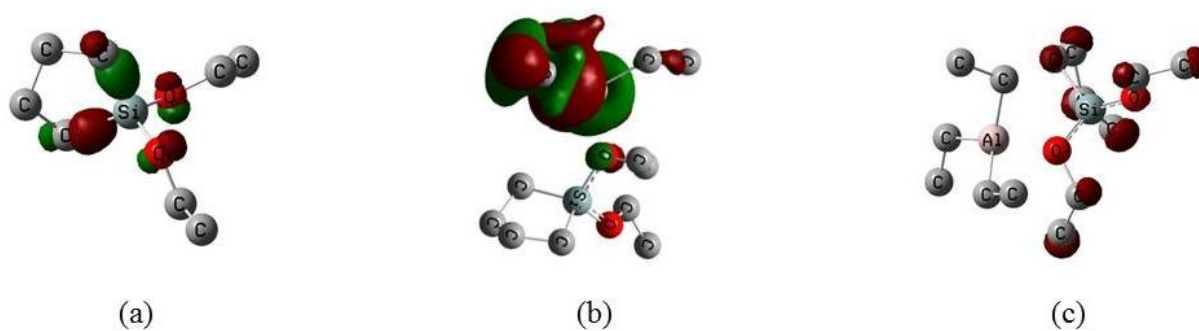

**Figure S4:** Computed frontier highest occupied molecular orbitals of (a) **D5** and (b) **TEAL-D5** complex, and the lowest unoccupied molecular orbital of (c) **TEAL-D5**. In **D5**, the HOMOs are localized on oxygen atoms and the carbon atoms directly bonded to Si atom. MOs of **TEAL-D5** complex indicate the donation of electron from the donor to **TEAL**.

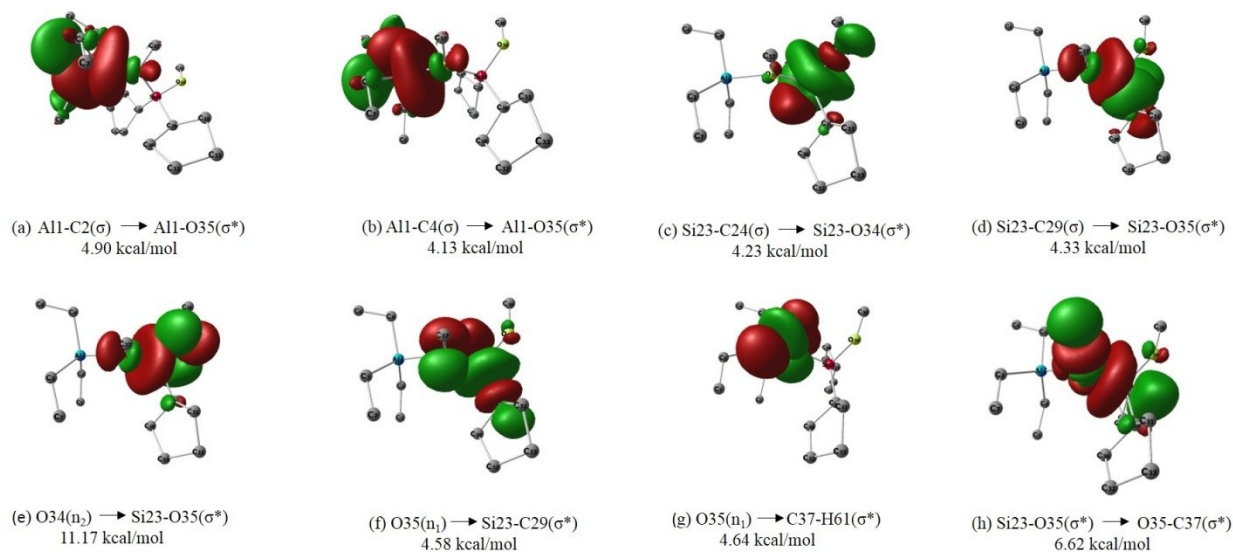

**Figure S5:** NBO diagrams of **TEAL-D1** complex showing donor-acceptor interaction for the stabilization of the complex. Hydrogen atoms are omitted for the sake of clarity.

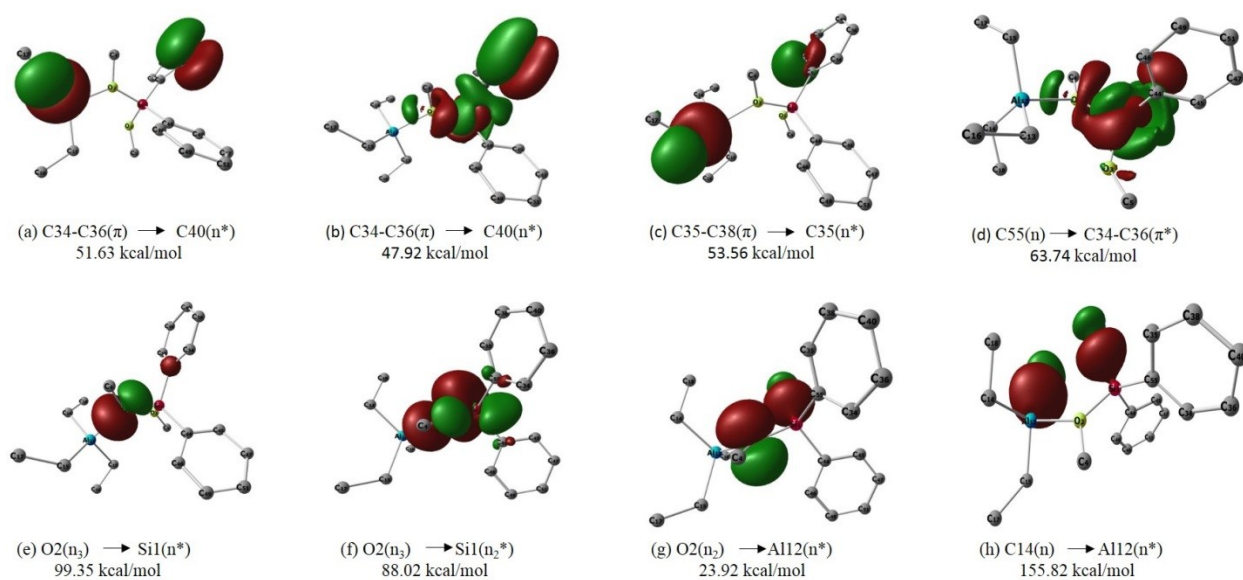

**Figure S6:** NBO diagrams of **TEAL-D2** complex showing donor-acceptor interaction for the stabilization of the complex. Hydrogen atoms are omitted for the sake of clarity.

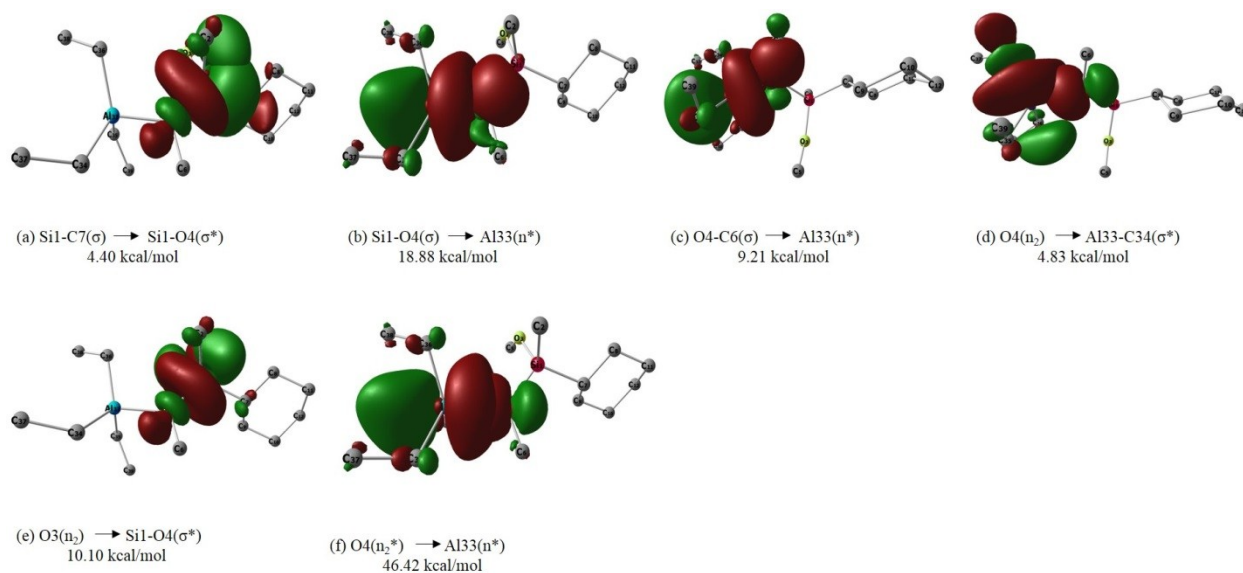

**Figure S7:** NBO diagrams of **TEAL-D3** complex showing donor-acceptor interaction for the stabilization of the complex. Hydrogen atoms are omitted for the sake of clarity.

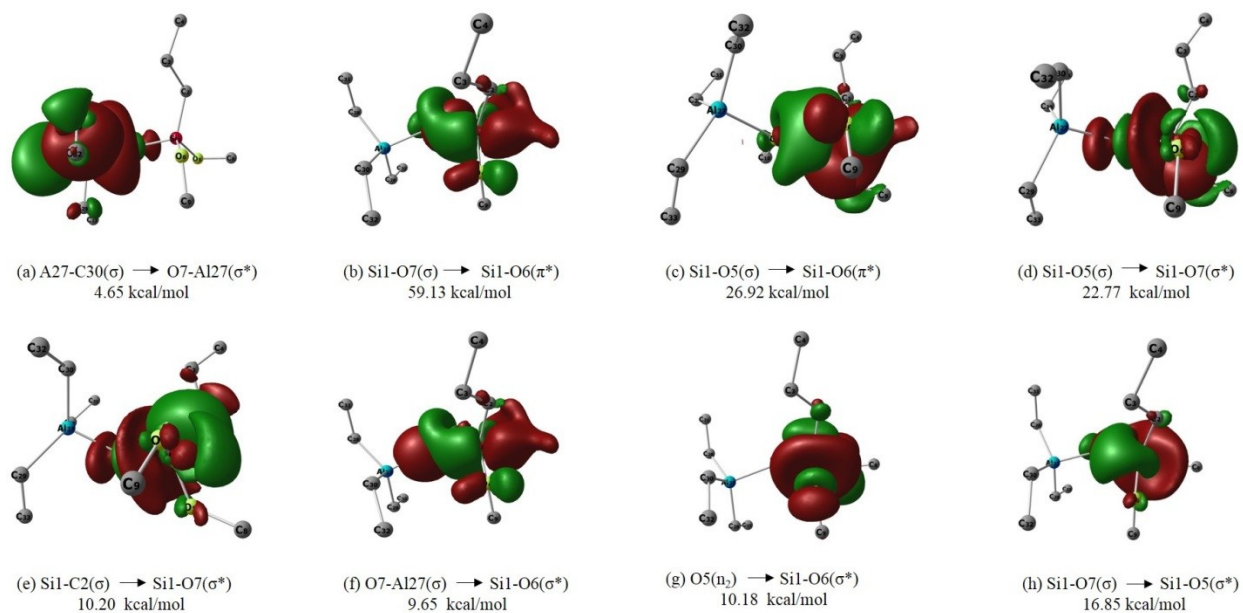

**Figure S8:** NBO diagrams of **TEAL-D4** complex donor-acceptor interaction for the stabilization of the complex. Hydrogen atoms are omitted for the sake of clarity.

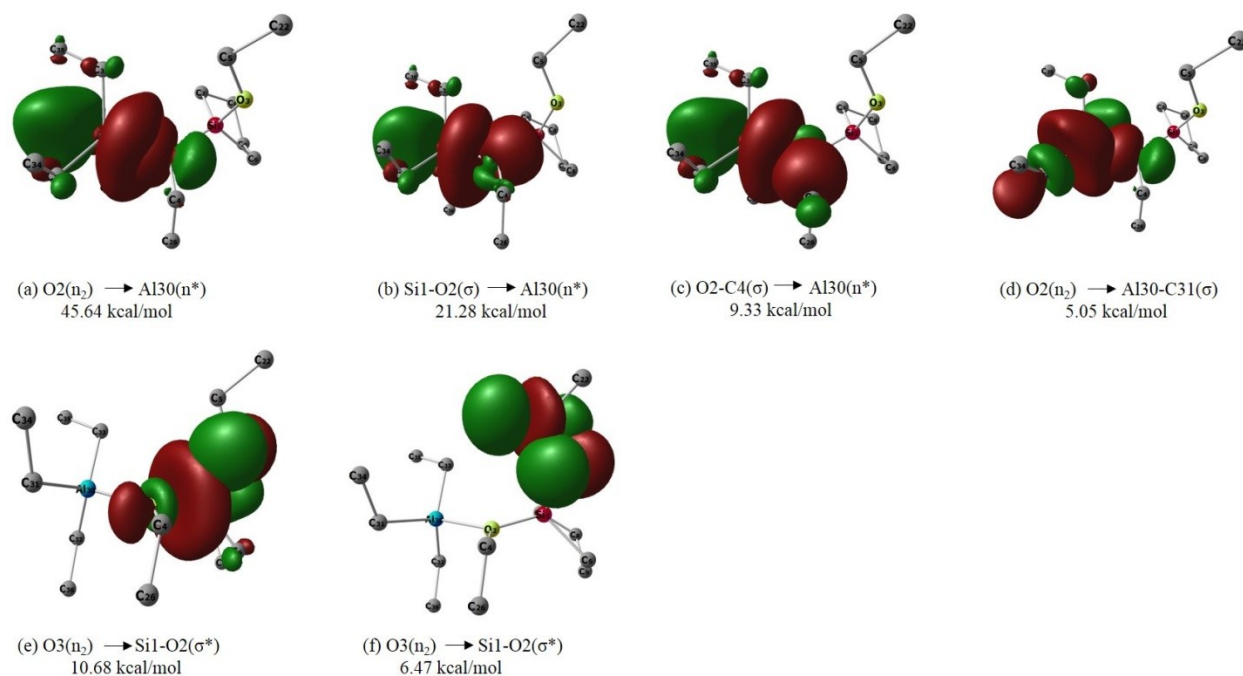

**Figure S9:** NBO diagrams of **TEAL-D5** complex showing donor-acceptor interaction for the stabilization of the complex. Hydrogen atoms are omitted for the sake of clarity.

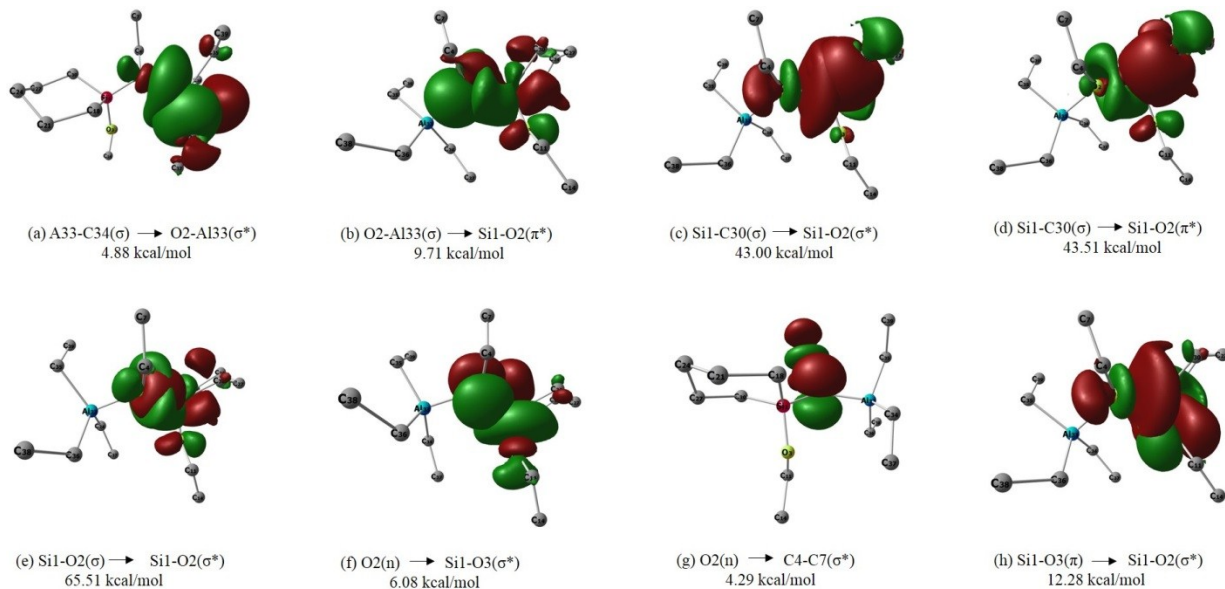

**Figure S10:** NBO diagrams of **TEAL-D6** complex showing donor-acceptor interaction for the stabilization of the complex. Hydrogen atoms are omitted for the sake of clarity.

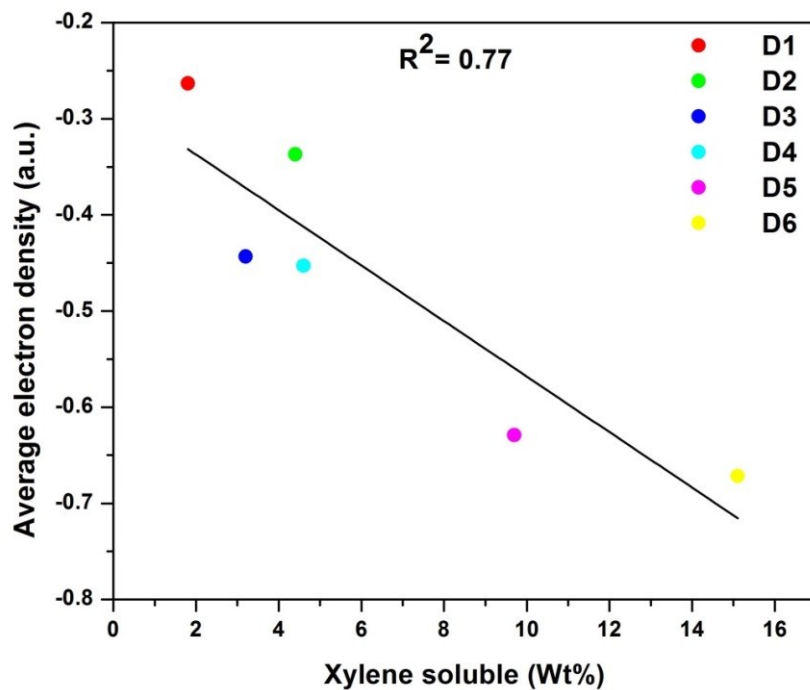

**Figure S11:** Correlation of average electron densities on the complexes formed between alkoxysilanes and TEAL with the xylene soluble (isotacticity) of polypropylene.

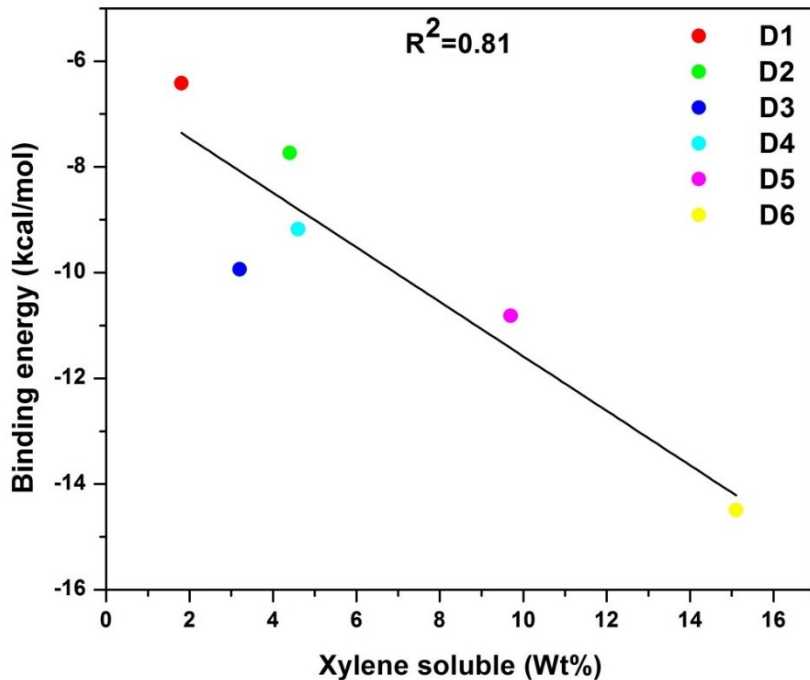

**Figure S12:** Correlation of binding energies of the complexes formed between alkoxysilanes and TEAL with the xylene soluble (isotacticity) of polypropylene.



**Table S1:** NPA charges (in a.u.) of relevant atoms of **TEAL**, external donors **D1-D6**, and complexes of **TEAL** and external donor.

|                | <b>Si</b> | <b>Al</b> | <b>O(1)</b> | <b>O(2)</b> | <b>O(3)</b> |
|----------------|-----------|-----------|-------------|-------------|-------------|
| <b>TEAL</b>    | -         | 1.78      | -           | -           | -           |
| <b>D1</b>      | 2.16      | -         | -0.92       | -0.92       | -           |
| <b>TEAL-D1</b> | 2.20      | 1.77      | -0.93       | -0.95       | -           |
| <b>D2</b>      | 2.11      | -         | -0.91       | -0.91       | -           |
| <b>TEAL-D2</b> | 2.17      | 1.77      | -0.94       | -0.92       | -           |
| <b>D3</b>      | 2.13      | -         | -0.92       | -0.92       | -           |
| <b>TEAL-D3</b> | 2.16      | 1.78      | -0.92       | -0.94       | -           |
| <b>D4</b>      | 2.27      | -         | -0.92       | -0.92       | -0.92       |
| <b>TEAL-D4</b> | 2.31      | 1.74      | -0.57       | -0.93       | -0.92       |
| <b>D5</b>      | 2.08      | -         | -0.92       | -0.92       | -           |
| <b>TEAL-D5</b> | 2.12      | 1.78      | -0.96       | -0.93       | -           |
| <b>D6</b>      | 2.09      | -         | -0.92       | -0.92       | -           |
| <b>TEAL-D6</b> | 2.15      | 1.75      | -0.96       | -0.93       | -           |

**Table S2:** ESP charges (in a.u.) of relevant atoms of **TEAL**, external donors **D1-D6**, and complexes of **TEAL** and external donor.

|                | <b>Si</b> | <b>Al</b> | <b>O(1)</b> | <b>O(2)</b> | <b>O(3)</b> |
|----------------|-----------|-----------|-------------|-------------|-------------|
| <b>TEAL</b>    | -         | 0.874     | -           | -           | -           |
| <b>D1</b>      | 0.035     | -         | -0.293      | -0.234      | -           |
| <b>TEAL-D1</b> | 0.329     | 0.610     | -0.396      | -0.131      | -           |
| <b>D2</b>      | 0.689     | -         | -0.336      | -0.338      | -           |
| <b>TEAL-D2</b> | 0.928     | 0.650     | -0.344      | -0.419      | -           |
| <b>D3</b>      | 0.878     | -         | -0.525      | -0.362      | -           |
| <b>TEAL-D3</b> | 0.624     | 0.613     | -0.365      | -0.249      | -           |
| <b>D4</b>      | 1.076     | -         | -0.399      | -0.496      | -0.464      |
| <b>TEAL-D4</b> | 0.920     | 0.581     | -0.370      | -0.440      | -0.311      |
| <b>D5</b>      | 0.864     | -         | -0.629      | -0.629      | -           |
| <b>TEAL-D5</b> | 0.960     | 0.495     | -0.512      | -0.663      | -           |
| <b>D6</b>      | 1.165     | -         | -0.649      | -0.694      | -           |

|                |       |       |        |        |   |
|----------------|-------|-------|--------|--------|---|
| <b>TEAL-D6</b> | 1.040 | 0.600 | -0.550 | -0.540 | - |
|----------------|-------|-------|--------|--------|---|

**Table S3:** Wiberg bond index (WBI) of relevant atoms of **TEAL**, external donors **D1-D6**, and complexes of **TEAL** and external donor.

|                | <b>Si</b> | <b>Al</b> | <b>O(1)</b> | <b>O(2)</b> | <b>O(3)</b> |
|----------------|-----------|-----------|-------------|-------------|-------------|
| <b>TEAL</b>    | -         | 1.87      | -           | -           | -           |
| <b>D1</b>      | 2.78      | -         | 1.69        | 1.69        | -           |
| <b>TEAL-D1</b> | 2.71      | 1.98      | 1.68        | 1.70        | -           |
| <b>D2</b>      | 2.86      | -         | 1.70        | 1.70        | -           |
| <b>TEAL-D2</b> | 2.77      | 1.97      | 1.70        | 1.71        | -           |
| <b>D3</b>      | 2.80      | -         | 1.69        | 1.68        | -           |
| <b>TEAL-D3</b> | 2.75      | 1.96      | 1.70        | 1.71        | -           |
| <b>D4</b>      | 2.69      | -         | 1.68        | 1.69        | 1.69        |
| <b>TEAL-D4</b> | 2.64      | 2.01      | 1.68        | 1.71        | 1.71        |
| <b>D5</b>      | 2.86      | -         | 1.70        | 1.70        | -           |
| <b>TEAL-D5</b> | 2.80      | 1.96      | 1.71        | 1.69        | -           |
| <b>D6</b>      | 2.85      | -         | 1.70        | 1.70        | -           |
| <b>TEAL-D6</b> | 2.77      | 2.00      | 1.71        | 1.70        | -           |
